# Supplementary material
Source: PubMed Central journal article supplement (PMC3939841)
Supplement: NIHMS540411-supplement-1.pdf [file NIHMS540411-supplement-1.pdf]

**Cell Metabolism, Volume 18**  
**Supplemental Information**

**Obesity Activates a Program of Lysosomal-Dependent  
Lipid Metabolism in Adipose Tissue Macrophages  
Independently of Classic Activation**

**Xiaoyuan Xu, Ambar Grijalva, Alicja Skowronski, Marco van Eijk, Mireille J. Serlie, and  
Anthony W. Ferrante, Jr.**

# Supplemental Tables & Figures

**Table S1.**

**Functional Clusters of Genes Correlated with Phenotypes**

| Clusters                                                                     | Functional Cluster            | Overrepresentation   | Corrected p-value     |
|------------------------------------------------------------------------------|-------------------------------|----------------------|-----------------------|
| Adipose Tissue Programs Correlated with Body Mass                            | Lysosome                      | 12.7                 | $4.5 \times 10^{-12}$ |
|                                                                              | Vesicle                       | 6.19                 | $4.8 \times 10^{-4}$  |
|                                                                              | Inflammatory response         | 5.97                 | $1.3 \times 10^{-5}$  |
|                                                                              | Cell/Lymphocyte activation    | 4.71                 | $1.6 \times 10^{-5}$  |
|                                                                              | B-cell/NK cell signaling      | 4.02                 | $3.3 \times 10^{-5}$  |
|                                                                              | Sh3 domain proteins           | 3.79                 | 0.018                 |
|                                                                              | Glycoproteins                 | 3.74                 | 0.00025               |
|                                                                              | Sh2 domain proteins           | 3.72                 | 0.041                 |
|                                                                              | Glycosidases                  | 3.13                 | 0.00077               |
|                                                                              | Chemotaxis                    | 2.89                 | 0.047                 |
|                                                                              | Actin reorganization          | 2.88                 | 0.04                  |
|                                                                              | Immune response               | 2.51                 | 0.0029                |
|                                                                              | Lipid/sphingolipid metabolism | 2.5                  | 0.0063                |
| Adipose Tissue Programs Correlated with Fasting [Insulin]                    | Lysosome                      | 10.72                | $1.7 \times 10^{-11}$ |
|                                                                              | Immune Effector               | 3.88                 | 0.012                 |
|                                                                              | Glycosylation                 | 3.77                 | $2.1 \times 10^{-5}$  |
|                                                                              | Wound Response                | 3.66                 | 0.037                 |
| Adipose Tissue Programs Correlated with a Macrophage Transcriptional Program | Lysosome                      | 17.02                | $4.8 \times 10^{-16}$ |
|                                                                              | Pigment Granule               | 8.26                 | $1.0 \times 10^{-9}$  |
|                                                                              | Cell cycle                    | 5.54                 | $2.9 \times 10^{-5}$  |
|                                                                              | B-cell/NK cell signaling      | 5.23                 | $3.9 \times 10^{-8}$  |
|                                                                              | Inflammatory response         | 4.84                 | $2.0 \times 10^{-4}$  |
|                                                                              | Immune cell activation        | 4.79                 | $8.4 \times 10^{-8}$  |
|                                                                              | Actin reorganization          | 4.53                 | 0.0013                |
|                                                                              | Phagocytosis                  | 4.25                 | $5.5 \times 10^{-5}$  |
|                                                                              | Ubiquitination                | 3.72                 | $3.6 \times 10^{-5}$  |
|                                                                              | Lipid metabolism              | 3.59                 | 0.001                 |
|                                                                              | Glycosidase                   | 2.94                 | $2.2 \times 10^{-4}$  |
|                                                                              | Apoptosis                     | 2.86                 | 0.0016                |
|                                                                              | ATP binding/Kinase            | 2.79                 | $6.6 \times 10^{-5}$  |
|                                                                              | Phosphatase                   | 2.64                 | $9.1 \times 10^{-4}$  |
|                                                                              | Lymphocyte homeostasis        | 2.54                 | 0.004                 |
|                                                                              | Antigen processing            | 2.34                 | 0.024                 |
|                                                                              | Zymogen                       | 2.12                 | $8.8 \times 10^{-4}$  |
|                                                                              | Phagocytosis                  | 2.11                 | $5.5 \times 10^{-5}$  |
|                                                                              | Vascular development          | 1.92                 | 0.025                 |
|                                                                              | Response to fungi             | 1.88                 | 0.034                 |
| Chemotaxis                                                                   | 1.8                           | 0.044                |                       |
| Immune system regulation                                                     | 1.79                          | $1.6 \times 10^{-4}$ |                       |
| Programs in ATMs Increased by Obesity                                        | Lysosome                      | 7.19                 | $9.1 \times 10^{-7}$  |
|                                                                              | ATP binding                   | 5.95                 | $2.3 \times 10^{-5}$  |
|                                                                              | Mitosis                       | 4.6                  | 0.012                 |
|                                                                              | Vesicle Transport             | 2.79                 | 0.047                 |

**Table S1. Function clusters of genes whose expression is associated with phenotypes.**

Microarray expression analysis was performed on either adipose tissue from a group of 34 mice or from adipose tissue macrophages from lean or obese mice. Using an overrepresentation algorithm functional classes of genes were identified that were associated with each phenotype.

**Figure S1.**

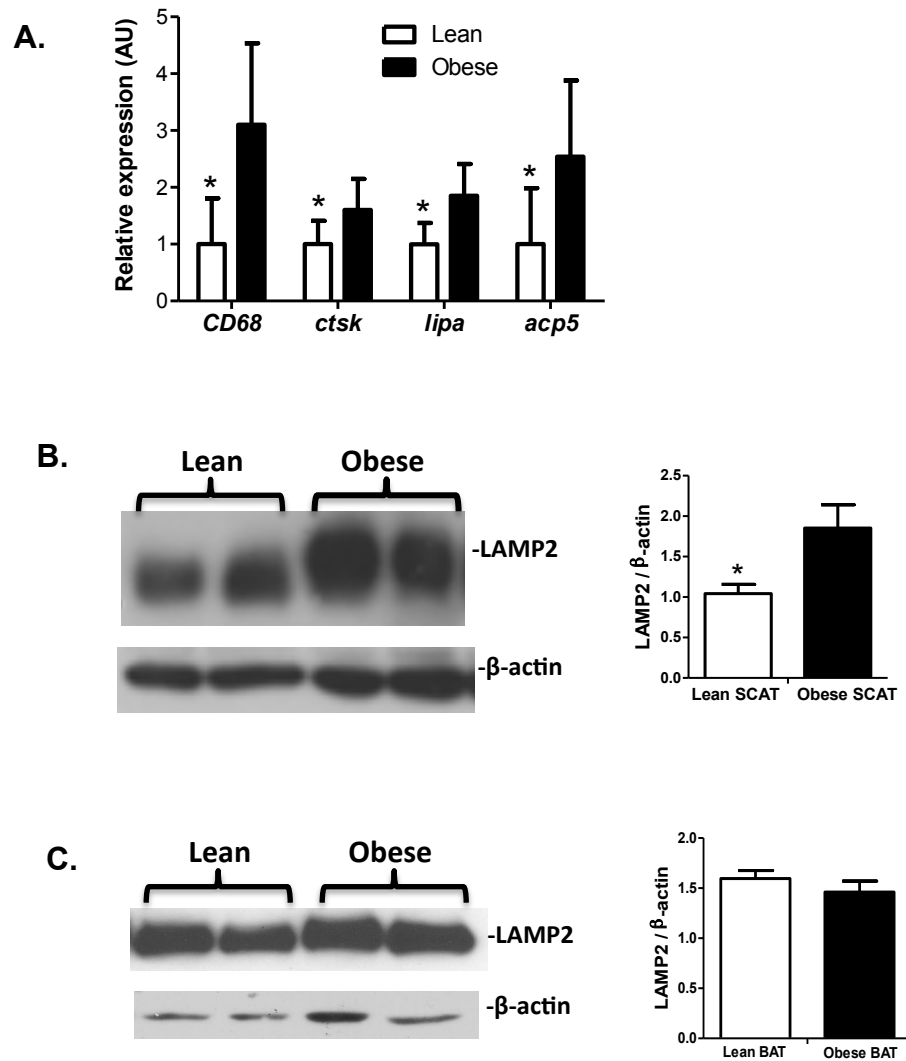

**Figure S1. Obesity increases expression of lysosomal genes and proteins in human and murine adipose tissue related to Figure 1** (A) Expression of a macrophage-specific gene and lysosome genes in human mesenteric adipose tissue from lean (n=5) and obese (n=20) individuals. Obesity (C57BL/6J *Lep ob/ob*) increases the expression of lysosomal protein LAMP2 in (B) subcutaneous but not (C) intrascapular brown adipose tissue of mice (n=4; \* p-value <0.05 lean vs obese). All values are means +/- SD.

**Figure S2.**

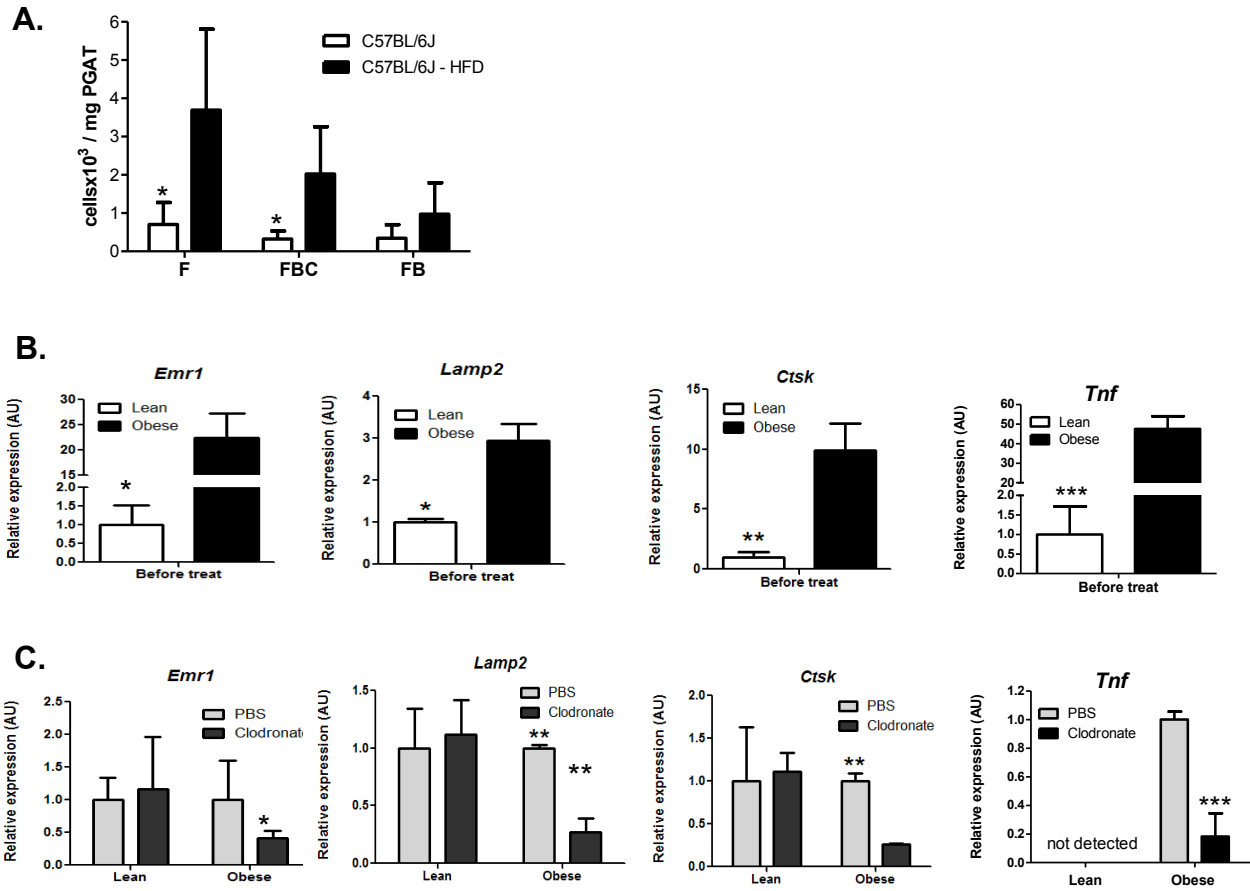

**Figure S2. Effect of high fat diet-induced obesity on ATM content and lysosomal gene expression related to Figure 2 (A)** Total F4/80+ macrophages (F) and macrophage sub-populations of CD11c+ (FBC) and CD11c- (FB) (n=4). **(B)** Gene expression of macrophage-specific (*Emr1*) and lysosomal genes (*Lamp2*, *Ctsk*) were measured in the adipocyte fraction of adipose tissue, ie buoyant cells after digestion, **(B)** before and **(C)** after depletion of macrophages by liposome encapsulated clodronate or PBS (normalized to PBS liposome treatment; n=5; p-value \* < 0.05, \*\* < 0.01, \*\*\* , 0.005). All values are means +/- SD.

**Figure S3.**

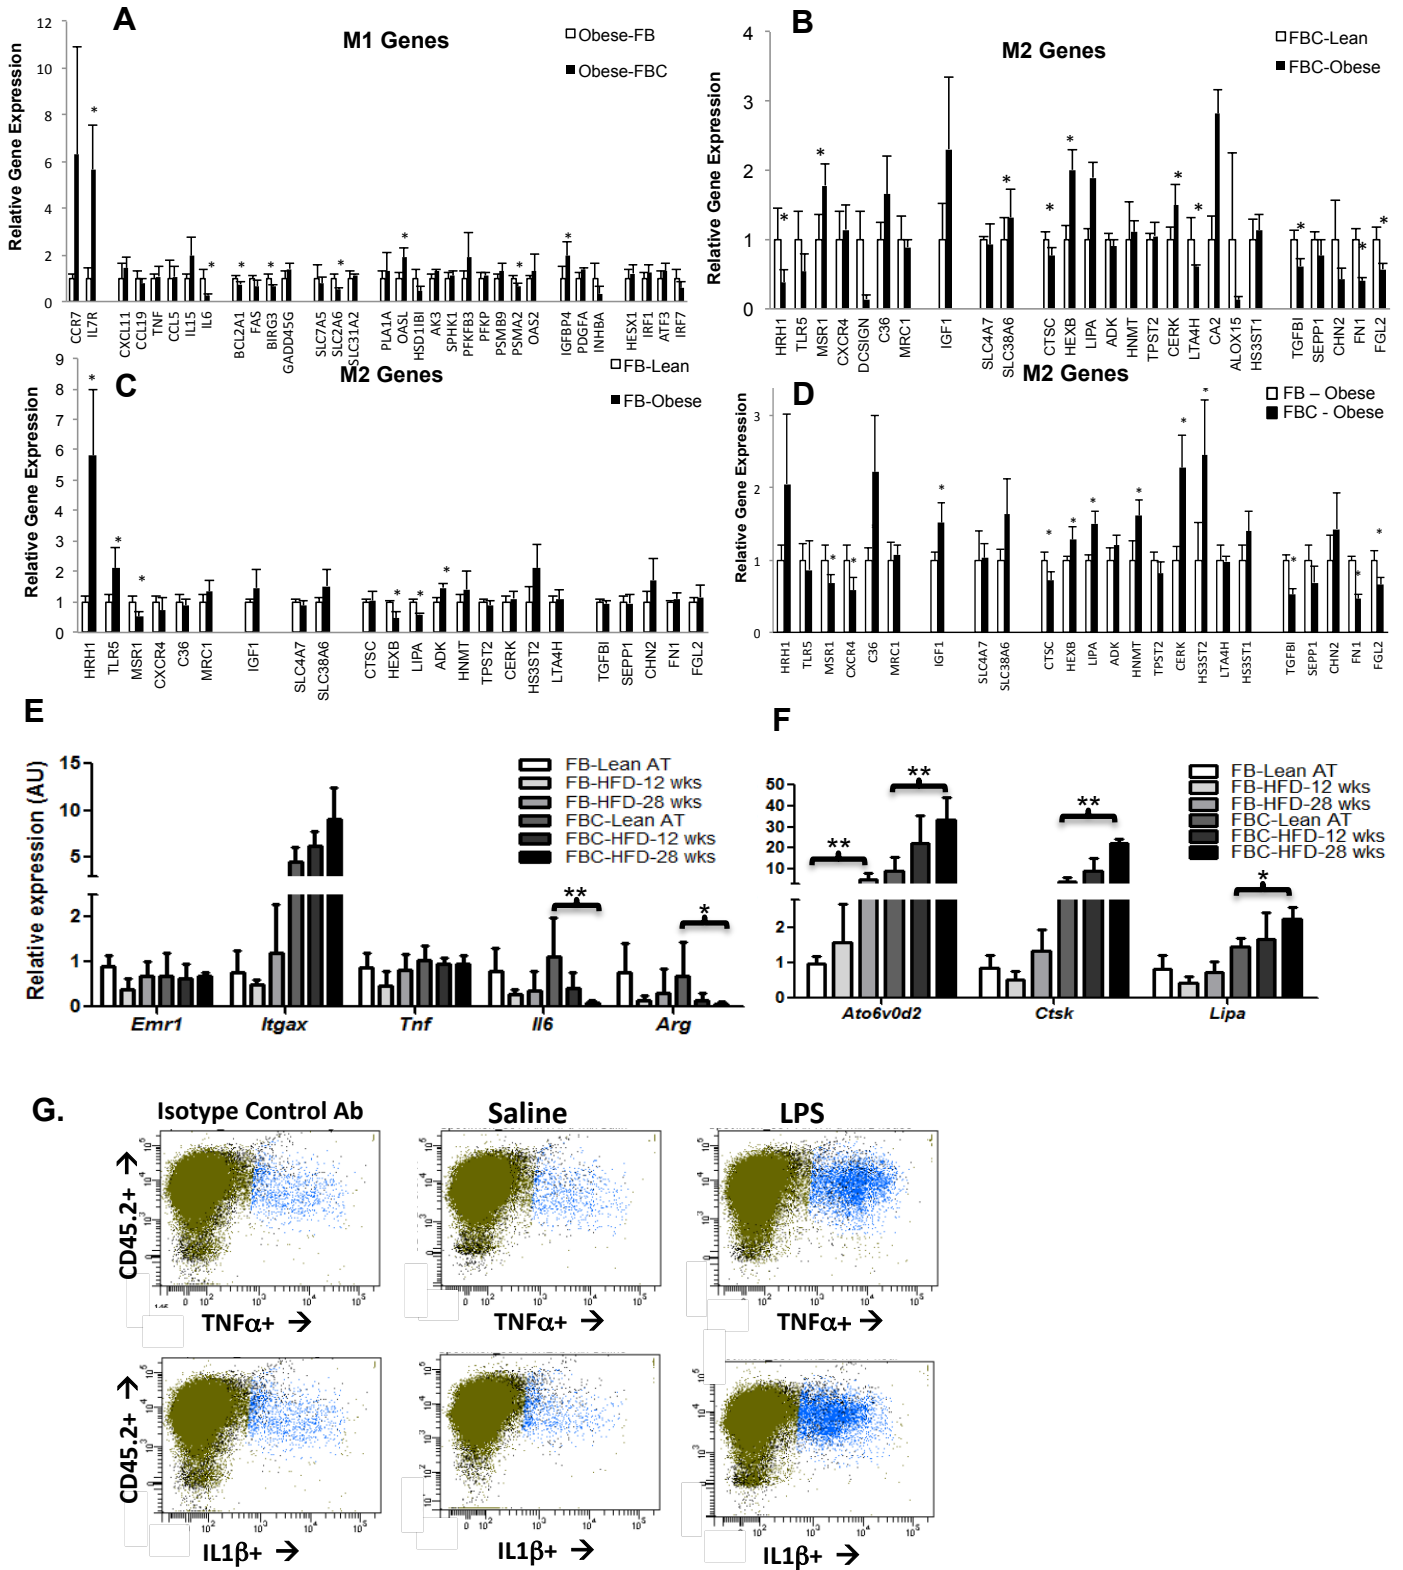

**Figure S3. Effects of Obesity on Inflammatory Polarization and Lysosomal Gene Expression by ATMs related to Figure 3** ATMs were purified by FACS from PGAT of obese *Lep ob/ob* or lean *Lep +/+* C57BL/6J male mice. **(A)** The expression of genes induced in classically activated (M1 polarized) macrophages were compared in purified F4/80+, CD11b+, CD11c- cells (FB's) and in F4/80+, CD11b+, CD11c+ (FBC's). The expression of genes induced in alternatively activated (M2 polarized) macrophages were compared **(B)** lean and obese FBs **(C)** lean and obese FBCs, and **(D)** obese FBs and FBCs ATMs were also purified by FACS from PGAT of lean low fat fed C57BL/6J male mice or obese high fat diet (HFD) C57BL/6J male mice that were HFD fed for 12 or 28 weeks. **(E)** The expression of macrophage (*Emr1*, *Itgax*) and inflammatory genes was measured in FB's and FBC's from 8 week old lean and HFD fed mice. **(F)** Expression of lysosomal genes were measured in the same FB and FBC populations (normalized to lean FB expression; n=4). **(G)** Splenocytes were isolated from mice 1 hour after intraperitoneal injection of saline or LPS and TNF $\alpha$  and IL1 $\beta$  content measured using FACS analysis. Typical FACS plots are shown (p value \* <0.05, \*\* < 0.01). All values are means +/- SD.

Figure S4.

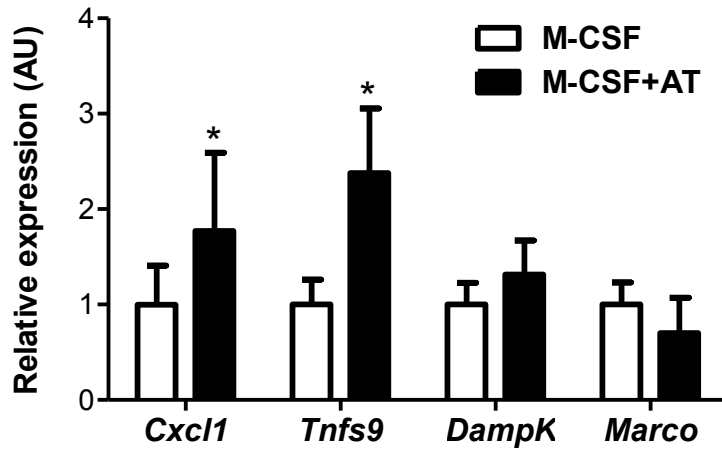

**Figure S4. Adipose tissue induces expression of ATM-specific genes related to figure 4.** Gene expression of ATM (*Cxcl1*, *Tnfs9*) and Kupffer cell (*Marco*, *Dampk*) enriched genes in bone marrow cells differentiated in the absence (white bars) or presence (black bars) of AT (n=4; \* p-value<0.05). All values are means +/- SD.

**Figure S5**

**A.**

*Atg7* **+/+**

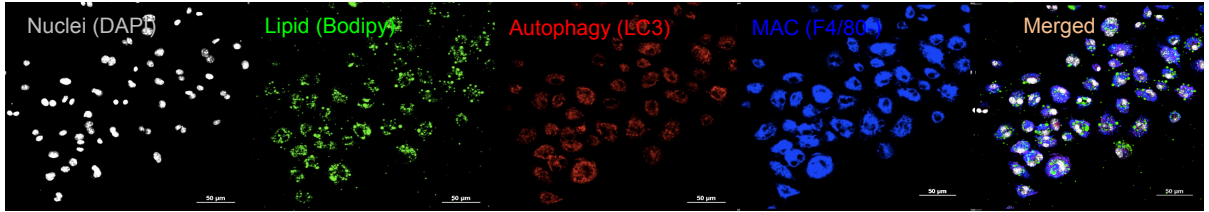

*Atg7* **KO**

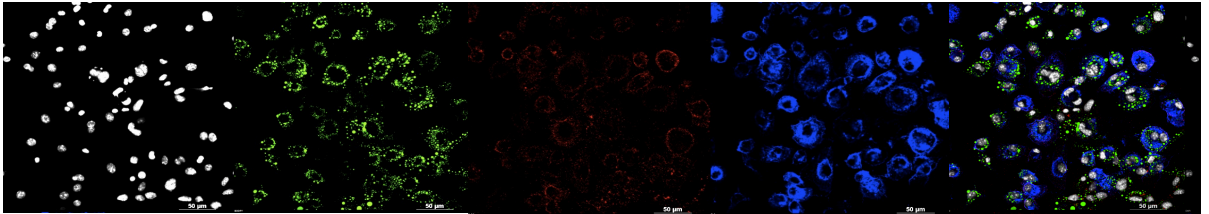

**B.**

M-CSF

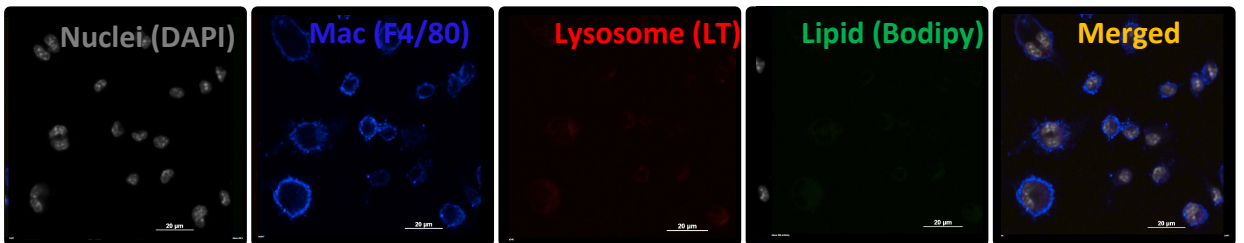

M-CSF AT

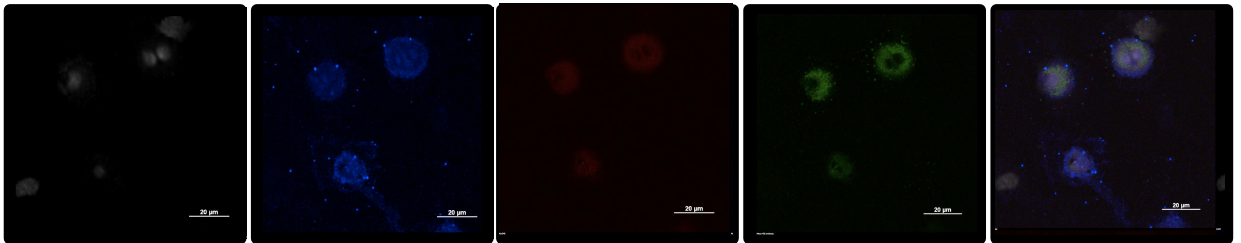

M-CSF+AT  
10 nM Baf

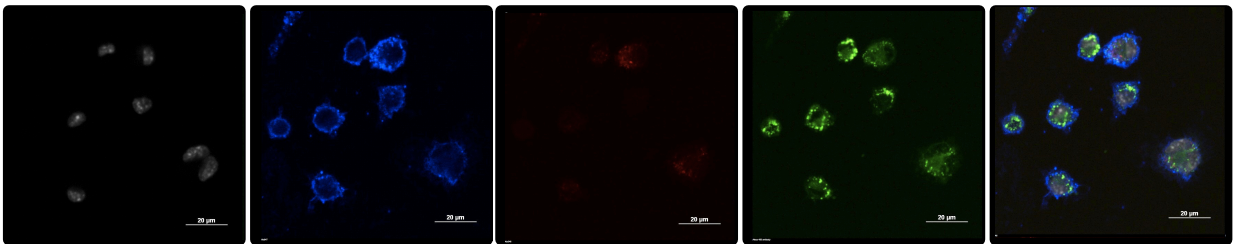

M-CSF+AT  
20 nM Baf

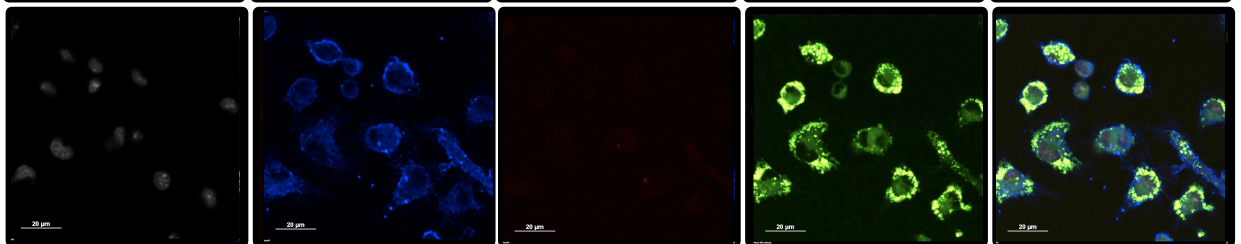

**C**

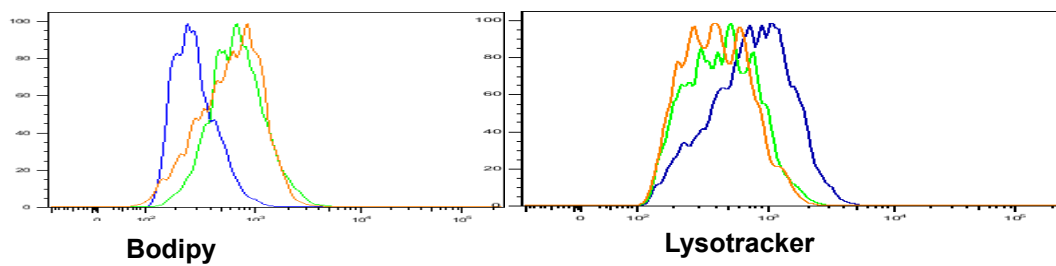



**Figure S5. Inhibition of autophagy and lysosome function on lipid content of ATMs related to Figure 5** Bone marrow cells were differentiated in the presence of M-CSF alone or M-CSF and adipose tissue (AT) as described in Methods. **(A)** Immunofluorescent confocal images of lipid content in differentiated ATMs derived from mice in which autophagy is impaired in myeloid cells (*Atg7* KO) or possess intact autophagy (*Atg7* +/+). **(B)** Immunofluorescent confocal images of lysosomes and lipid in differentiated ATMs and ATMs treated with bafilomycin A (Baf) at the indicated concentrations for 12 hours. Nuclei were identified with DAPI, macrophages (Mac) with an anti-F4/80 antibody, lysosomes with LysoTracker (LT), neutral lipid with Bodipy. **(C)** FACS histogram quantifying lipid and lysosome content by Bodipy and LysoTracker staining, respectively in ATMs (blue) and ATMs treated with 10nM (beige) or 20nM (green) of bafilomycin A for 12 hours.

**Figure S6.**

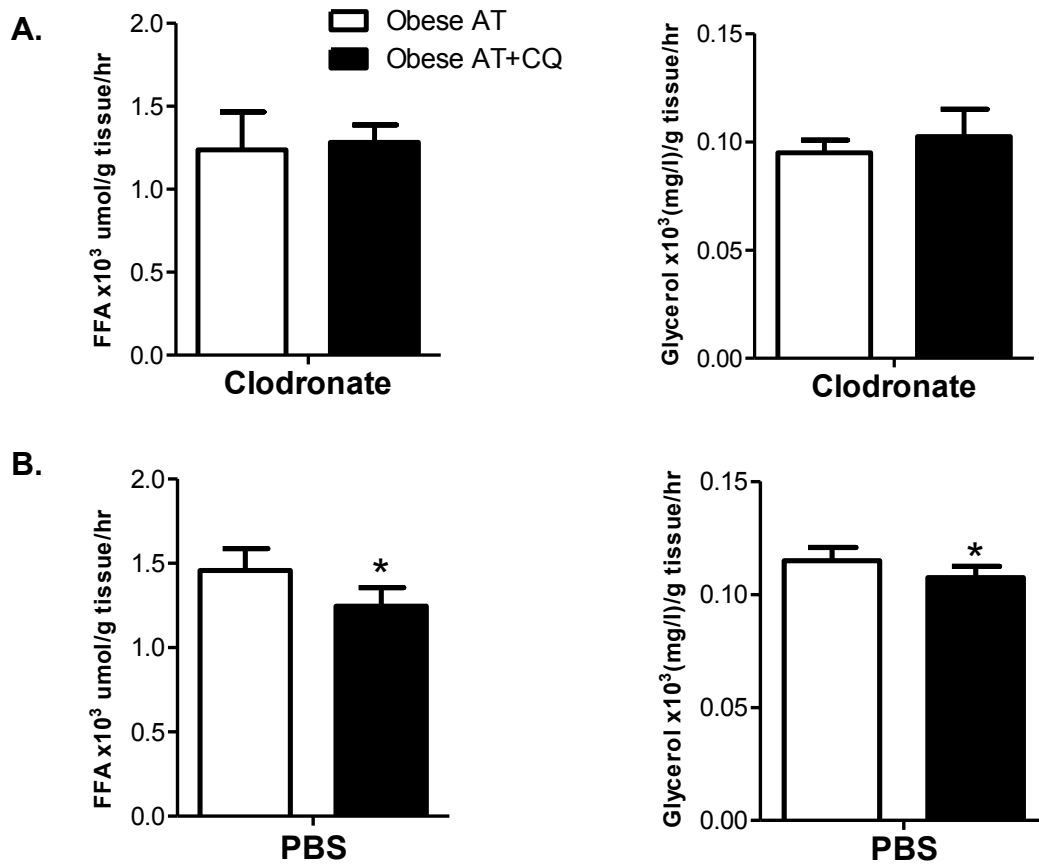

**Figure S6. Depletion of macrophages from adipose tissue eliminates the anti-lipolytic effect of chloroquine related to Figure 6.** Perigonadal adipose tissue from obese (C57BL/6 *Lep ob/ob*) mice were either (A) depleted of macrophages by treatment with liposomes containing clodronate or were (B) treated with liposomes containing PBS. The release of free fatty acids (FFA) and glycerol were measured in the presence (white bars) or absence (black bars) of chloroquine (CQ). (n=4, \* p-value < 0.05). All values are means +/- SD.

## Table S2

### Primer Sequences used for qPCR

#### Mouse:

|                 |                                                                                        |
|-----------------|----------------------------------------------------------------------------------------|
| <i>Arg1</i>     | Forward: 5'-CTCCAAGCCAAAGTCCTTAGAG-3'<br>Reverse: 5'-AGGAGCTGTCATTAGGGACATC-3'         |
| <i>Adfp</i>     | Forward: 5'-CCCGTATTTGAGATCCGTGTT-3'<br>Reverse: 5'-TAGGTATTGGCAACCGCAAT-3'            |
| <i>Atp6v0d2</i> | Forward: 5'-AGCCAGCCTAACTCAGC-3'<br>Reverse: 5'-GCTTCTTCCTCATCTCCGTGTC-3'              |
| <i>Atp6v1b2</i> | Forward: 5'-AGCCTCGTCTCACCTACAAGA-3'<br>Reverse: 5'-TCTCAGCGTATCTGGGAAACTT-3'          |
| <i>ApoE</i>     | Forward: 5'-CTG ACA GGA TGC CTA GCC G-3'<br>Reverse: 5'-CGC AGG TAA TCC CAG AAG C-3'   |
| <i>Fabp4</i>    | Forward: 5'-GGGGCCAGGCTTCTATTCC-3'<br>Reverse: 5'-GGAGCTGGGTAGGTATGGG-3'               |
| <i>Atp7</i>     | Forward: 5'-CCTGCACAACACCAACACAC-3'<br>Reverse: 5'-CACCTGACTTTATGGCTTCCC-3'            |
| <i>Cd36</i>     | Forward: 5'-GCGACATGATTAATGGCACA-3'<br>Reverse: 5'-CCTGCAAATGTCAGAGGAAA-3'             |
| <i>Ccr2</i>     | Forward: 5'-TGCCATCATAAAGGAGCCA-3'<br>Reverse: 5'-AGCACATGTGGTGAATCCAA-3'              |
| <i>Chop</i>     | Forward: 5'-CAG AGC CAG AAT AAC AGC CG-3'<br>Reverse: 5'-GTC TCC AAG GTG AAA GGC AG-3' |
| <i>Clec4f</i>   | Forward: 5'-AAGCAACAACCTCTGGACACGAC-3'<br>Reverse: 5'-TAGATGGCTCCCAAGCAACTG-3'         |
| <i>Cpt1a</i>    | Forward: 5'-TGC ACT ACG GAG TCC TGC AA-3'<br>Reverse: 5'-GGA CAA CCT CCA TGG CTC AG-3' |
| <i>Csf1r</i>    | Forward: 5'-CATACAGCATTACAACCTGGACCTACC-3'<br>Reverse: 5'-CAGGACATCAGAGCCATTACAG-3'    |
| <i>Cxcl1</i>    | Forward: 5'-GGGACACCTTTTAGCATCTTTTG-3'<br>Reverse: 5'-ATGGCTGGGATTCACCTCAAG-3'         |

## Table S2

|              |                                                                                           |
|--------------|-------------------------------------------------------------------------------------------|
| <i>Dmpk</i>  | Forward: 5'- AACCTCTTCTCCAGGGCTTC -3'<br>Reverse: 5'- CCTTCGTGGGCTACTCCTACTG-3'           |
| <i>Emr1</i>  | Forward: 5'-CTTTGGCTATGGGCTTCCAGTC-3'<br>Reverse: 5'-GCAAGGAGGACAGAGTTTATCGTG-3'          |
| <i>Fsn</i>   | Forward: 5'- TCTTTCTAACAACCACCCTCTGG -3'<br>Reverse: 5'- CTTCACGACTCCATCACGAATG -3'       |
| <i>Igf2r</i> | Forward: 5'- TGGCGAATGAAGTCTACCTGAA-3'<br>Reverse: 5'- CTCCCACTCAAACACAAAGTCG -3'         |
| <i>Il1b</i>  | Forward: 5'- TGA AGC AGC TAT GGC AAC TG-3'<br>Reverse: 5'- AGG TCA AAG GTT TGG AAG CA -3' |
| <i>Il10</i>  | Forward: 5'-GCTCTTACTGACTGGCATGAG-3'<br>Reverse: 5'-CGCAGCTCTAGGAGCATGTG-3'               |
| <i>Itgam</i> | Forward: 5'- ATT CGG TGA TCC CTT GGA TT-3'<br>Reverse: 5'- GTT TGT TGA AGG CAT TTC CC-3'  |
| <i>Itgax</i> | Forward: 5'-CCTACTTTGGGGCATCTCTTTG-3'<br>Reverse: 5'-GCACCTCTGTTCTCCTCCTCTC-3'            |
| <i>Lamp2</i> | Forward: 5'- ATGTGCCTCTCTCCGGTTAAA-3'<br>Reverse: 5'- GCAAGTACCCTTTGAATCTGTCA-3'          |
| <i>Lipa</i>  | Forward: 5'- GGAAACAGCAGAGGAAACACCT -3'<br>Reverse: 5'- CACGGGAGCCAAGACTAAAAC -3'         |
| <i>Lpl</i>   | Forward: 5'-TTTGGCTCCAGAGTTTGACC-3'<br>Reverse: 5'-TGTGTCTTCAGGGGTCCTTAG-3'               |
| <i>Marco</i> | Forward: 5'- GAAGACAGACCGATTTTGACC -3'<br>Reverse: 5'- ATCCATTGCCACAGCACATCTC-3'          |
| <i>Mrc2</i>  | Forward: 5'-TACAGCTCCACGCTATGGATT-3'<br>Reverse: 5'-CACTCTCCCAGTTGAGGTACT-3'              |
| <i>Msr1</i>  | Forward:5'-AGAGGGCTTACTGGACAAACTG-3'<br>Reverse: 5'-GGCTTTCCTGGTGCTCCTG-3'                |

## Table S2

|               |                                                                                                  |
|---------------|--------------------------------------------------------------------------------------------------|
| <i>Nos2</i>   | Forward: 5'-AATCTTGGAGCGAGTTGTGG-3'<br>Reverse: 5-CAGGAAGTAGGTGAGGGCTTG-3'                       |
| <i>Ppib</i>   | Forward: 5'-CAGCAAGTTCCATCGTGTTCATC-3'<br>Reverse: 5'-CTCTTTCCTCCTGTGCCATCTC-3'                  |
| <i>Pparg</i>  | Forward: 5'- GGAAGACCACTCGCATTCTT -3'<br>Reverse: 5'- GTAATCAGCAACCATTGGGTCA -3'                 |
| <i>Ppib</i>   | Forward: 5'- CAG CAA GTT CCA TCG TGT CAT C -3'<br>Reverse: 5'- CTCTTTCCTCCTGTGCCATCTC-3'         |
| <i>Plin2</i>  | Forward: 5'- TCTGCGGCCATGACAAGTG -3'<br>Reverse: 5'- GCAGGCATAGGTATTGGCAAC-3'                    |
| <i>Rps3</i>   | Forward: 5'- ATC AGA GAG TTG ACC GCA GTT G -3'<br>Reverse: 5'- AAT GAA CCG AAG CAC ACC ATA G -3' |
| <i>Tnf</i>    | Forward: 5'-CCAGACCCTCACTAGATCA-3'<br>Reverse: 5'-CACTTGGTGGTTTGCTACGAC-3'                       |
| <i>Tlr2</i>   | Forward: 5'-AAACAACCTTACCGAAACCT3'<br>Reverse: 5'-TGTAATTTGTGAGATTGG-3'                          |
| <i>Tlr4</i>   | Forward: 5'- ATGGCATGGCTTACACCACC -3'<br>Reverse: 5'- GAGGCCAATTTTGTCTCCACA -3'                  |
| <i>Tnfsf9</i> | Forward: 5'- GAGCCCTGTTGTGTAGTGTGG -3'<br>Reverse: 5'- GCAGGCATAGGTATTGGCAAC                     |

### Human:

|             |                                                                              |
|-------------|------------------------------------------------------------------------------|
| <i>ACP5</i> | Forward: 5'- AGGCTTTTCCTCCAACCTGT-3'<br>Reverse: 5'-TCACATACGTGGGCATCTGT-3'  |
| <i>CD68</i> | Forward: 5'- GCTGGCTGTGCTTTTCTCG-3'<br>Reverse: 5'-GTCACCGTGAAGGATGGCA-3'    |
| <i>CTSK</i> | Forward: 5'- CCACGATGGTGCAGTGTAAAC-3'<br>Reverse: 5'-GCACAAACAAATGGGGAAAC-3' |
| <i>LIPA</i> | Forward: 5'-CCTGCTTCACGTCCCTATGT-3'<br>Reverse: 5'- TGATGCTGCAAGAAAAGCAG-3'  |

**Table S2 Primer sequences** Sequences for primers and primer pairs used in quantitative RT-PCR.

## SUPPLEMENTAL EXPERIMENTAL PROCEDURES

### **Animals and animal care**

All mice were obtained from the Jackson Laboratory (Bar Harbor, ME) except for C57BL/6J *Atg7 fl/fl* which were generated by and obtained from Masaaki Komatsu at Tokyo Metropolitan Institute of Medical Science. For microarray studies mice C57BL/6J, B6.Cg-*Lep<sup>ob/ob</sup>/J* (C57BL/6J *Lep<sup>ob/ob</sup>*), B6.Cg-*Ay/J* (C57BL/6J *Ay/a*), were obtained at 7 weeks of age. Mice were fed a low fat diet (Research Diets # D12490) unless otherwise noted. High fat diet animals were fed a food pellets that derived ~ 60% of its calories from fat (Research Diets # D12492) beginning at 8 weeks of age. Mice treated with insulin sensitizing agents pioglitazone (10mg/kg/day) or CL316243 (3mg/kg/day) began treatment at 20 weeks of age by including the drug in their food. Mice were sacrificed at 22-23 weeks of age and perigonadal adipose tissue collected. For all other studies mice male were obtained from Jackson Laboratory at 8-10 weeks of age. Mice made obese by high fat feeding for non-microarray studies were begun on a high fat diet at 8 weeks of age (Research Diets Inc. # D12492). Mice in non-microarray studies were sacrificed at 12-14 weeks of age. Mice in all studies were housed 3-5 animals per ventilated Plexiglas cages within a pathogen-free barrier facility that maintained a 12-hour light/12-hour dark cycle. All procedures were approved by the Columbia University IACUC.

### **Isolation stromal vascular cells and the adipocyte-rich fraction of adipose tissue**

Adipose tissue was isolated from mice immediately after CO<sub>2</sub> asphyxiation. Tissues were minced into fine (<10-mg) pieces and centrifuged at 500 g for 5 minutes to remove connective tissue debris. Minced samples were placed in a digestion solution of DMEM containing Liberase 3 or Liberase TM (0.14 units/ml) (Roche Applied Science)/ BSA, 20 mg/ml, DNase I, 50 U/ml (Sigma-Aldrich). The samples were then incubated at 37°C on an orbital shaker (185 rpm) for 30-45minutes. Once digestion was complete, samples were passed through a sterile 250-µm nylon mesh (Sefar Filtration Inc.). The suspension was centrifuged at 500 g for 5 minutes. The pelleted cells were collected as the SVCs and top layer of lipid containing cells/material were collected as the buoyant adipocyte-rich fraction (ARF). The SVCs were resuspended in erythrocyte lysis buffer (BD Biosciences) and incubated at room temperature for 3 minutes. The erythrocyte-depleted SVCs were centrifuged at 500 g for 5 minutes and the pellet cells resuspended in FACS buffer (PBS, 0.2%, fatty acid depleted-BSA, 5 mM EDTA) at a concentration of 7 x 10<sup>6</sup> cells/ml for fluorescence activated cell sorting or purification, or in culture medium (DMEM (Invitrogen), 20% L929 cell- conditioned media, 10% fetal bovine serum (Invitrogen), 1% of Penicillin-Streptomycin liquid (Invitrogen)) at a concentration of 650,000 cells/ml for culture and live confocal microscopy studies. The ARF was washed with DMEM buffer and collected again as the buoyant top layer of lipid rich material after a 5 minute centrifugation at 500g at room temperature.

### **Quantitative RT-PCR.**

Total RNA was extracted from the perigonadal (epididymal or parametrial) (PGAT), inguinal subcutaneous (SCAT) and brown adipose tissue (BAT) of individual mice using Trizol reagent (Invitrogen). RNA was isolated from SVCs and primary cells using RNeasy mini-kits (Qiagen). First-strand cDNA was synthesized using Superscript III reverse transcriptase and random hexamer (Invitrogen). Quantitative RT-PCR assays were carried out using DNA Engine Opticon 2 system instruments (Bio-Rad) and PCR SYBR Green I QuantiTect Master Mix (QIAGEN). Data were normalized to *Ppib* using the  $\Delta\Delta C(t)$  method and are presented as relative transcript levels. All primers used are listed in Supplemental Table 1.

### ***Hematoxylin and eosin staining and Oil Red O staining of purified cells***

F4/80+, CD11b+, CD11c- (FB) and F4/80+, CD11b+, CD11c+ cells were purified from the stromal vascular fraction of perigonadal adipose tissue using an FACS Aria cell sorter as described above (Becton Dickson). Purified cells were placed on microscope slides air dried. Differentiated bone marrow cells were cultured on chamber slides. Adherent cells were washed and air dried, fixed with zinc-formalin fixative (Anatech Ltd.) for 10 minutes and thereafter stained by hematoxylin and eosin stain or Oil Red O using standard methods .

### ***Immunophenotyping and flow cytometry.***

For standard FACS analysis, cells were collected in FACS buffer as described above and incubated in the dark for 30 min with of 0.5mg/ml FcBlock (BD Pharmingen) and then for an additional 30 min with fluorophore-conjugated antibodies or fluorescent dyes. The antibodies used were as follows: CD11b-PE and APC, CD11c-PE and PE-TR, CD3e-PE, CD19-PE, NK1.1-APC, TNF $\alpha$ -PE and IL-1 $\beta$ -PE (all eBioscience), CD45.2-Percp-Cy5.5, and Ly6G-PE and FITC, (all BD Pharmingen), F4/80-APC (AbD Serotec) and fluorescently tagged isotype controls. Fluorescent dyes used were LysoTracker and 4, 4-difluoro-1,3,5,7,8-pentamethyl-4-bora-3a,4a-diaza-s-indacene (Bodipy) (Invitrogen). After incubation with primary antibodies and/or fluorescent dyes, cells were washed twice in FACS buffer, resuspended in FACS buffer containing 4', 6-diamidino-2-phenylindole dihydrochloride (DAPI). For immune phenotyping, cells were analyzed using an LSR II flow cytometer (Becton Dickson) equipped with a dozen excitation lines. Data analysis was performed using Flowjo software (Tree Star). All samples were gated on DAPI- cells before quantification. For purification, cells were sorted using a BD FACS Aria Cell Sorter into Dulbecco's modified Eagle's medium (DMEM) containing 20% fetal bovine serum. For FACS analysis of intracellular proteins, ie TNF $\alpha$  and IL-1 $\beta$ , fixation/permeabilization was performed on splenocytes or stromal vascular cells of PGAT using a commercially available kit according to the manufacturer's instructions (BD Cytotfix/Cytoperm Fixation/Permeabilization Kit). Following permeabilization cells were incubated with the appropriate antibodies and analyzed as above. We used the following immunophenotyping to identify immune cell populations in adipose tissue: Immune cells: CD45.2+; Macrophages: F4/80+; FBC Macrophages: F4/80+, CD11b+, CD11c+; FB Macrophages: F4/80+, CD11b+, CD11c-; Dendritic Cells (DC): F4/80-, CD11b+, CD11c+; T-cells: CD3e+, NK1.1-; NKT: CD3e+, NK1.1+; NK cells: CD3e-, NK1.1+; B-cells CD19+, CD11b-.

### ***Microarray gene expression.***

For whole adipose tissue samples, total RNA was extracted from the perigonadal adipose tissue of individual mice using a commercially available acid-phenol reagent (Trizol; Invitrogen Inc.). RNA was isolated from sorted FBC (F4/80+, CD11b+, CD11c+) cells and FB (F4/80+, CD11b+, CD11c-) cells using RNeasy micro-kits (Qiagen), using a PicoPure RNA isolation kit then amplified two-rounds. Labeled cRNA was prepared according to the manufacturer's instructions (Affymetrix) and hybridized to either Mouse U74v2 arrays (whole adipose tissue) or Mouse Genome 430 2.0 arrays (purified FB and FBC adipose tissue macrophages). Primary data extraction was performed with Microarray Suite 5.0 (Affymetrix) for U74v2 arrays and Expression Console (Affymetrix), Data were deposited in NCBI GEO database (series accession #:

[GSE8831](http://www.ncbi.nlm.nih.gov/geo/query/acc.cgi?acc=GSE8831)). [Functional class analysis was performed using DAVID Suite software \(NIAID, NIH <http://david.abcc.ncifcrf.gov>\).](http://www.ncbi.nlm.nih.gov/geo/query/acc.cgi?acc=GSE8831)

### **Immunofluorescence histochemistry**

Stromal vascular cells or bone marrow-derived cells were cultured on coated chamber slides (LAB-TEK) in DMEM/20% L929 cell-conditioned media/10% fetal calf serum/ 1% PCN & Streptomycin. For identification of lysosomes, live cells were washed with PBS and cultured in DMEM containing 10  $\mu$ M LysoTracker (Invitrogen) for 30 minutes at 37°C. Cells were washed with PBS three times at room temperature. Cells were fixed with Z-fix (Anatech Ltd) for 10 minutes and washed again with PBS three times at room temperature. To reduce background fluorescence the fixed samples were incubated 0.2 M glycine for 30 minutes at room temperature. All samples were incubated in blocking buffer (PBS solution containing 1% BSA and 5% goat serum) for 30 minutes at room temperature. To identify macrophages, samples were incubated with an anti-F4/80 mAb at 1  $\mu$ g/ml (Invitrogen) or control antibody - Rat IgG2a (Invitrogen) at 1  $\mu$ g/ml in blocking buffer for 30 minutes at room temperature. Samples were washed with PBS three times and then incubated with secondary Cy5 - labeled goat anti-rat IgG (Invitrogen) at 5  $\mu$ g/ml in blocking buffer for 1 hour at room temperature. Samples were washed and incubated with DAPI nuclear dye (1:8,000 v/v) and Bodipy (1:300 v/v) for 5 min at room temperature. After 3 further washes with PBS at room temperature, the slides were covered with glass coverslips affixed with Flucro-gel mounting solution (Electron Microscopy Sciences). Fluorescent confocal microscopy was performed using a Nikon AIR MP.

### **Western blot**

Stromal vascular cells, adipocyte-rich fractions and purified F4/80+ cells were isolated from PGAT from lean (C57BL/6J *Lep<sup>+/+</sup>*) and obese (C57BL/6J *Lep<sup>ob/ob</sup>*) male 12-15 week old mice. Protein was extracted using Tissue Extraction Reagent I with protease inhibitor cocktail (Invitrogen). Protein concentration was measured using BIO-RAD Protein Assay (Bio-Rad). Samples were run in 8%, 12% or 15% SDS-polyacrylamide gels (Bio-Rad) under reducing conditions according to the manufacturer's instructions. Transfer of proteins to nitrocellulose membranes (Thermo) was carried out using standard protocols. Proteins were detected by immunoblotting with relevant antibodies and the ECL chemiluminescence detection system (Amersham Biosciences) according to the manufacturer's instructions. Primary antibodies against mouse TNF $\alpha$  (Abcam), LAMP-2 (Abcam),  $\beta$ -actin (Calbiochem) or  $\alpha$ -Tubulin (Sigma) were commercially obtained. The intensity of each protein band was determined using Image Analysis, Quantity One (Bio-Rad) and normalized against  $\beta$ -actin or  $\alpha$ -tubulin.

### **Ex vivo bone marrow cells differentiation**

Bone marrow cells were collected from femurs of 4-8 week old C57BL/6J *Lep<sup>+/+</sup>* mice. Cells were washed in basic bone marrow culture medium, (MEM- $\alpha$  with 10% FBS, 1% Non-essential amino acids (Invitrogen) and 1% penicillin (Invitrogen)). Cells were counted and plated at 50-60 million cells per 175 ml tissue culture flask in basic bone marrow medium at 37 C, 5% CO<sub>2</sub>. After two days in culture, non-adherent cells were collected, counted and plated in 25 mm tissue culture dishes at ~1.5 million cells per plate in 2 ml of culture medium supplemented with human M-CSF (30ng/ml) (R&D Systems). After two days of differentiation in the presence of M-CSF, media was removed and fresh culture medium supplemented with M-CSF (30ng/ml) was added. Porous tissue inserts (BD Bioscience) containing 100 mg of PGAT from C57BL/6J 12 week old male mice were placed in the wells. Controls contained no adipose tissue. After three days of further differentiation in the presence of adipose tissue the adherent cells were analyzed by immunohistochemistry, FACS analysis and qPCR. To generate ATMs with impaired autophagy, bone marrow was



isolated from mice that carried the LysM-Cre (B6.129P2-*Lyz2tm1(cre)Ifo/J*) (Jackson Laboratory, Bar Harbor ME) and the homozygous floxed allele *Atg7 fl/fl*. Lysosome function was inhibited by incubating differentiated cells with differentiation medium containing either chloroquine (20  $\mu$ M), baflomycin A (10nM or 20nM) for 12 hours.

#### ***Liposome-encapsulated clodronate preparation.***

Liposomes were prepared as previously described . Briefly, 16 mg of cholesterol and 172 mg of phosphatidylcholine (Sigma-Aldrich) were dissolved in chloroform in a round-bottom flask. The chloroform was evaporated at 37°C in a rotary evaporator under vacuum until a thin lipid film formed. Two grams of clodronate (dichloromethylenediphosphonic acid disodium salt) (Sigma-Aldrich) were dissolved in 10 ml of PBS. The clodronate-PBS solution or the control-PBS solution was added to the lipid film and shaken at 250 rpm at room temperature for 30 minutes to disperse the lipid film. The solution was sonicated at room temperature for 15 minutes until no clumps of lipid were visible at room temperature in a water bath sonicator (50 watts). The liposomes were centrifuged at 49,400 g for 1 hour and resuspended in 5 ml of PBS.

#### ***Ex vivo adipose tissue studies.***

Adipose tissue was removed from perigonadal fat pads of male lean (C57BL/6J *Lep<sup>+/+</sup>*) or obese (C57BL/6J *Lep<sup>ob/ob</sup>*) mice. Under sterile conditions, the tissue was cut into small pieces (<10 mg) in DMEM supplemented with 1% penicillin. Minced samples were centrifuged for 1 minute at 400 g at room temperature. The buoyant tissues were collected and cultured in 100 mg per ml of explant culture medium (DMEM with 10% FBS, 1% penicillin and 2% FA-free BSA) at 37°C in a 5% CO<sub>2</sub> incubator for 6 hours, after which the tissue was placed in fresh culture medium. After an additional 20 hours the medium was replaced with fresh medium with and without 20  $\mu$ M chloroquine. To assess the rate of NEFA and glycerol release, medium was removed and the explants washed three times in PBS; the explants were cultured in fresh medium of DMEM containing 2% FA-free BSA for 2 hours. [NEFA] and [glycerol] were measured in the medium using enzymatic colometric kits (NEFA - Wako Diagnostics; glycerol - Sigma-Aldrich).

Adipose tissue explants depleted of macrophages were cultured with liposome-encapsulated clodronate as previously described . Briefly after 6 hours of culture, fresh medium with 10% liposomes containing either clodronate or PBS was added to explants. They were maintained for 20 hours at 37°C in a CO<sub>2</sub> incubator, then wash three times with PBS. The media was replaced with DMEM containing 10% FBS, 1% penicillin and 2% FA-free BSA with and without 20  $\mu$ M chloroquine. The explant samples were cultured for an additional 20 hours and [NEFA] and [glycerol] measured in the medium as above.

#### ***Electron microscopy***

Following sacrifice, animals were perfused with using 4% paraformaldehyde in 1M phosphate buffer at room temperature at least 15 minutes until the perfusion completed.. Adipose tissue is removed and further fixed with 2.5% glutaraldehyde in 0.1M Sorenson's buffer (pH 7.2) more than 48 hours at 4°C. Tissues were postfixed in 1% OsO<sub>4</sub> also in Sorenson's buffer for one hour. After dehydration tissue is embedded in Lx-112 (Ladd Research Industries, Inc.). 60nm thick sections were cut on the MT-7000 ultramicrotome. The sections were stained with uranyl acetate and lead citrate and examined under a JEOL JEM-1200 EXII electron microscope. Images were captured with an ORCA-HR digital camera (Hamamatsu) and recorded with an AMT Image Capture Engine.

Reference: Principles and Techniques of Electron Microscopy. Biological Applications, Third Edition, M.A. HAYAT

### ***In Vivo lysosome inhibition experiments***

Twelve week old obese C57BL/6J *Lep<sup>ob/ob</sup>* male mice were fasted for four hours and then anesthetized with ketamine (80 mg/kg, ip) and xylazine (10 mg/kg, ip) and placed in the supine position on a warm heating pad. The shaved abdomen was sterilely prepped with a betadine solution and the perigonadal adipose tissue depots were identified without compromise of the peritoneum. An evenly divided dose of 5 mg/kg of chloroquine (Sigma) in sterile PBS or PBS alone were injected into each PGAT. Mice recovered overnight with free access to food and water. 20 hours after surgery mice were once again fasted for four hours. Serum was collected to measure [NEFA] and [glycerol] after initial four hour fast (but prior to treatment) and after final fast.

### ***Human adipose tissue***

Twenty obese (BMI ranging from 34.8-61.3 kg/m<sup>2</sup>) Caucasian women with a mean age of 40.5 (26-50) years who were scheduled for Roux-en-Y gastric bypass (RYGB) surgery were included. Patients were eligible if they had no Diagnostic and Statistical Manual of Mental Disorders (DSM) IV diagnosis, were older than 18 years, understood the objective of the study, and gave informed consent. Biopsies of the mesenteric fat compartment were taken at the beginning of the surgical procedure after an overnight fast. The control group consisted of age and gender matched female subjects scheduled for elective cholecystectomy. They were lean (BMI 20-24.4 kg/m<sup>2</sup>) and had a normal glucose tolerance test, HOMA-IR and HbA1C. The samples were snap frozen in liquid nitrogen, and thereafter stored in -80°C for subsequent analysis. The women participated in a study on the short term metabolic effects of bariatric surgery. The study was approved by the Medical Ethical Committee of the Academic Medical Center, (AMC) Amsterdam

### ***Statistics***

Data are presented as mean  $\pm$  SD. All *P* values were calculated using 2-tailed distribution, 2-sample unequal variance Student's *t* test. All calculations were performed using Microsoft Excel and Statistica (Statsoft Inc.).

### **SUPPLEMENTAL REFERENCES**

John A. Kiernan & George I. Kumar, Education Guide Special Stains and H & E (2002).

Kosteli, A., Sugaru, E., Haemmerle, G., Martin, J.F., Lei, J., Zechner, R., and Ferrante, A.W., Jr. (2010). Weight loss and lipolysis promote a dynamic immune response in murine adipose tissue. *The Journal of Clinical Investigation* 120, 3466-3479.

Gallagher S & Chakavarti D Immunoblot Analysis (2008)
